# Supplementary material
Source: publisher site journal article supplement (https://static.cambridge.org/content/id/urn:cambridge.org:id:article:S0007114520002780/resource/name/S0007114520002780supp001.docx)
Supplement: Supplementary file 1 [file S0007114520002780supp001.docx]

|  | **Study participants** | | **p1** |
| --- | --- | --- | --- |
|  | **Participants in 3rd follow-up (n=187)** | **Losses to follow-up from baseline (n=248)** |
| **Characteristics** | Mean (SD) | Mean (SD) |
| *Mothers* |  |  |  |
| Age (years) | 26.8 (6.3) | 25.3 (5.8) | 0.010 |
| Education (years) | 9.5 (3.0) | 9.3 (3.1) | 0.516 |
| Monthly household income (MW) | 3.7 (2.9) | 3.2 (2.3) | 0.058 |
| Pre-pregnancy BMI (kg/m²) | 24.8 (5.5) | 24.6 (4.5) | 0.598 |
| Gestational weight gain (kg) | 14.0 (6.6) | 14.0 (6.5) | 0.991 |
|  |  |  |  |
| *Children* |  |  |  |
| Gestational age (weeks) | 39.1 (1.1) | 39.2 (1.0) | 0.533 |
| Birthweight (g) | 3.5 (0.4) | 3.4 (0.5) | 0.345 |
| Length at birth (cm) | 48.8 (1.8) | 48.5 (1.9) | 0.152 |
| BMI at birth (kg/m²)b | 14.5 (1.3) | 14.4 (1.5) | 0.834 |
|  |  |  |  |
|  | n (%) | n (%) |  |
| Marital status |  |  | 0.560 |
| Married/Consensual union | 148 (43.8) | 190 (56.2) |  |
| Other | 28 (40.0) | 42 (60.0) |  |
| Parity (number of parturition) |  |  | 0.171 |
| Nulliparous | 70 (39.1) | 109 (60.9) |  |
| Multiparous (≥1 child) | 117 (45.7) | 139 (54.3) |  |
| Type of delivery |  |  | 0.522 |
| Normal | 113 (42.0) | 156 (58.0) |  |
| Cesarean section | 63 (45.3) | 76 (54.7) |  |
| Gestational weight gain |  |  | 0.826 |
| Non-excessive | 96 (43.6) | 124 (56.4) |  |
| Excessive | 80 (42.6) | 108 (57.4) |  |
| Child’s BMI-for-age and sex |  |  | 0.284 |
| Underweight/normal weight (≤85percentile) | 100 (41.0) | 144 (59.0) |  |
| Excess body weight (>85 percentile) | 76 (46.3) | 88 (53.7) |  |
| Sex |  |  | 0.444 |
| Male | 97 (44.9) | 119 (55.1) |  |
| Female | 79 (41.1) | 113 (58.9) |  |
| *ADIPOQ* genotypes |  |  | 0.633 |
| TT | 133 (42.5) | 180 (57.5) |  |
| TG+GG | 43 (45.3) | 52 (54.7) |  |
| *LEP* genotypes |  |  | 0.929 |
| GG | 66 (42.9) | 88 (57.1) |  |
| GA+AA | 110 (43.3) | 144 (56.7) |  |

**Supplementary material 1**. Losses to follow-up: from baseline to third follow-up. PREDI Study, Brazil, 2012-2018.

1p-values refers to *t*-Student test for continuous variables, and Chi-square test for categorical variables. aIntergrowth-21st standard; bWHO 2006 growth standard. SD = Standard Deviation; MW = Minimum Wage, US$ 359.54 = 1 MW in February 2012; BMI, Body Mass Index; *ADIPOQ*-T = wild-type allele; *ADIPOQ*-G = risk allele; *LEP*-G = wild-type allele; *LEP*-A = risk allele.
